# Supplementary material for: Investigation and prediction of the severity of p53 mutants using parameters from structural calculations
Source: PubMed Central journal article supplement (PMC2730554; doi:10.1111/j.1742-4658.2009.07124.x), 2009-08
Supplement: ejb0276-4142-SD1.pdf [file ejb0276-4142-SD1.pdf]

**Table S1 p53 sequences.** The species from where the p53 sequences, used in the conservation parameter, were extracted.

| <b>Latin</b>            | <b>Trivial name</b>    | <b>Accession number</b> | <b>Database</b> |
|-------------------------|------------------------|-------------------------|-----------------|
| Barbus                  | Barbel                 | Q9W678                  | SwissProt       |
| Bos primigenius indicus | Zebu                   | P67938                  | SwissProt       |
| Bos taurus              | Cow                    | P67938                  | SwissProt       |
| Canis                   | Canis (Wolfs and dogs) | Q29537                  | SwissProt       |
| Cavia porcellus         | Guinea pig             | Q9WUR6                  | SwissProt       |
| Chlorocebus             | African Green Monkey   | P13481                  | SwissProt       |
| Cricetulus griseus      | Chinese hamster        | O09185                  | SwissProt       |
| Cricetus cricetus       | Golden hamster         | Q00366                  | SwissProt       |
| Danio rerio             | Zebrafish              | P79734                  | SwissProt       |
| Delphinapterus leucas   | Beluga (White whale)   | Q8SPZ3                  | SwissProt       |
| Felis catus             | Cat                    | P41685                  | SwissProt       |
| Gallus gallus           | Chicken                | P10360                  | SwissProt       |
| Homo sapiens            | Human                  | P04637                  | SwissProt       |
| Ictalurus punctatus     | Channel catfish        | O93379                  | SwissProt       |
| Macaca fascicularis     | Crab-eating Macaque    | P56423                  | SwissProt       |
| Macaca fuscata          | Japanese Macaque       | P61260                  | SwissProt       |
| Macaca mulatta          | Rhesus Macaque         | P56424                  | SwissProt       |
| Marmota monax           | Woodchuck              | O36006                  | SwissProt       |
| Meriones unguiculatus   | Gerbil                 | Q920Y0                  | SwissProt       |
| Mus musculus            | House mouse            | P02340                  | SwissProt       |
| Oncorhynchus mykiss     | Rainbow trout          | P25035                  | SwissProt       |
| Oryctolagus cuniculus   | Rabbit                 | Q95330                  | SwissProt       |
| Ovis aries              | Sheep                  | P51664                  | SwissProt       |
| Pan troglodytes         | Chimpanzee             | XP_511957               | Refseq          |
| Platichthys flesus      | European flounder      | O12946                  | SwissProt       |
| Rattus norvegicus       | Rat                    | P10361                  | SwissProt       |
| Spalax judaei           | Blind mole rats        | CAH03844                | EMBL            |
| Sus scrofa              | Pig                    | Q9TUB2                  | SwissProt       |
| Tupaia belangeri        | Treeshrew              | Q9TTA1                  | SwissProt       |
| Tetraodon miurus        | Congo pufferfish       | Q9W679                  | SwissProt       |
| Xenopus laevis          | African clawed frog    | P07193                  | SwissProt       |
| Xenopus tropicalis      | Western clawed frog    | Q6NTF1                  | SwissProt       |
| Xiphophorus hellerii    | Green swordtail        | O57538                  | SwissProt       |
| Xiphophorus maculatus   | Southern platyfish     | Q92143                  | SwissProt       |
