# Supplementary material for: Investigation and prediction of the severity of p53 mutants using parameters from structural calculations
Source: PubMed Central journal article supplement (PMC2730554; doi:10.1111/j.1742-4658.2009.07124.x), 2009-08
Supplement: ejb0276-4142-SD2.pdf [file ejb0276-4142-SD2.pdf]

**Table S2 Breast cancer mutations**

| <b>Codon</b> | <b>Wild type amino acid</b> | <b>Mutant amino acid</b> | <b>Measured WAF1 activity</b> | <b>Class WAF1</b> | <b>WAF1 predicted severity</b> | <b>WAF1 predicted class</b> |
|--------------|-----------------------------|--------------------------|-------------------------------|-------------------|--------------------------------|-----------------------------|
| 110          | R                           | C                        | 10.9                          | 2                 | 46.2                           | 2                           |
| 110          | R                           | L                        | 12.3                          | 2                 | 88.2                           | 2                           |
| 110          | R                           | P                        | 10.8                          | 2                 | 47.8                           | 2                           |
| 113          | F                           | C                        | 12.6                          | 2                 | 74.6                           | 2                           |
| 126          | Y                           | D                        | 12.6                          | 2                 | 83.0                           | 2                           |
| 127          | S                           | F                        | 12.5                          | 2                 | 117.9                          | 2                           |
| 128          | P                           | S                        | 48.1                          | 1                 | 33.9                           | 1                           |
| 129          | A                           | V                        | 67.6                          | 1                 | 25.2                           | 1                           |
| 130          | L                           | F                        | 9.1                           | 2                 | 58.7                           | 2                           |
| 130          | L                           | P                        | 10.1                          | 2                 | 164.8                          | 2                           |
| 130          | L                           | R                        | 8.5                           | 2                 | 44.1                           | 2                           |
| 130          | L                           | V                        | 8.9                           | 2                 | 59.2                           | 2                           |
| 131          | N                           | S                        | 10.0                          | 2                 | 55.0                           | 2                           |
| 132          | K                           | E                        | 0.6                           | 2                 | 80.6                           | 2                           |
| 132          | K                           | N                        | 10.5                          | 2                 | 86.8                           | 2                           |
| 132          | K                           | Q                        | 10.9                          | 2                 | 67.7                           | 2                           |
| 132          | K                           | R                        | 14.1                          | 2                 | 71.0                           | 2                           |
| 133          | M                           | I                        | 64.4                          | 1                 | 52.7                           | 1                           |
| 134          | F                           | C                        | 9.5                           | 2                 | 69.7                           | 2                           |
| 134          | F                           | L                        | 10.7                          | 2                 | 75.4                           | 2                           |
| 135          | C                           | F                        | 10.4                          | 2                 | 57.1                           | 2                           |
| 135          | C                           | G                        | 8.3                           | 2                 | 96.1                           | 2                           |
| 135          | C                           | R                        | 0.9                           | 2                 | 128.2                          | 2                           |
| 135          | C                           | S                        | 7.4                           | 2                 | 74.1                           | 2                           |
| 135          | C                           | W                        | 12.8                          | 2                 | 110.6                          | 2                           |
| 135          | C                           | Y                        | 10.9                          | 2                 | 97.2                           | 2                           |
| 136          | Q                           | E                        | 12.0                          | 2                 | 69.7                           | 1                           |
| 136          | Q                           | R                        | 65.5                          | 1                 | 53.5                           | 1                           |
| 138          | A                           | P                        | 10.9                          | 2                 | 67.6                           | 2                           |
| 138          | A                           | T                        | 12.3                          | 2                 | 51.7                           | 1                           |
| 138          | A                           | V                        | 31.8                          | 1                 | 59.4                           | 2                           |
| 139          | K                           | N                        | 10.4                          | 2                 | 73.5                           | 1                           |
| 141          | C                           | R                        | 11.0                          | 2                 | 188.1                          | 2                           |
| 141          | C                           | Y                        | 9.8                           | 2                 | 190.6                          | 2                           |
| 143          | V                           | A                        | 11.4                          | 2                 | 42.6                           | 2                           |
| 143          | V                           | M                        | 10.3                          | 2                 | 64.8                           | 2                           |
| 144          | Q                           | H                        | 16.0                          | 2                 | 50.8                           | 1                           |
| 144          | Q                           | L                        | 16.5                          | 2                 | 72.8                           | 2                           |
| 144          | Q                           | P                        | 13.8                          | 2                 | 65.2                           | 2                           |
| 145          | L                           | P                        | 2.0                           | 2                 | 41.5                           | 2                           |
| 145          | L                           | Q                        | 12.4                          | 2                 | 38.2                           | 2                           |
| 145          | L                           | R                        | 12.6                          | 2                 | 149.1                          | 2                           |
| 146          | W                           | R                        | 58.9                          | 1                 | 31.2                           | 1                           |
| 147          | V                           | D                        | 11.6                          | 2                 | 76.2                           | 2                           |
| 149          | S                           | P                        | 21.3                          | 2                 | 82.0                           | 1                           |

| <b>Codon</b> | <b>Wild type amino acid</b> | <b>Mutant amino acid</b> | <b>Measured WAF1 activity</b> | <b>Class WAF1</b> | <b>WAF1 predicted severity</b> | <b>WAF1 predicted class</b> |
|--------------|-----------------------------|--------------------------|-------------------------------|-------------------|--------------------------------|-----------------------------|
| 150          | T                           | I                        | 48.7                          | 1                 | 54.1                           | 1                           |
| 151          | P                           | A                        | 1.5                           | 2                 | 72.2                           | 2                           |
| 151          | P                           | H                        | 10.8                          | 2                 | 78.7                           | 2                           |
| 151          | P                           | L                        | 13.2                          | 2                 | 53.9                           | 2                           |
| 151          | P                           | S                        | 0.9                           | 2                 | 126.3                          | 2                           |
| 151          | P                           | T                        | 9.4                           | 2                 | 151.8                          | 2                           |
| 152          | P                           | L                        | 9.5                           | 2                 | 87.5                           | 2                           |
| 152          | P                           | S                        | 8.5                           | 2                 | 47.8                           | 1                           |
| 153          | P                           | L                        | 31.8                          | 1                 | 79.7                           | 1                           |
| 153          | P                           | S                        | 30.0                          | 1                 | 17.3                           | 1                           |
| 154          | G                           | D                        | 39.7                          | 1                 | 48.4                           | 1                           |
| 154          | G                           | S                        | 11.5                          | 2                 | 49.5                           | 1                           |
| 154          | G                           | V                        | 8.4                           | 2                 | 68.2                           | 2                           |
| 155          | T                           | I                        | 8.9                           | 2                 | 156.6                          | 2                           |
| 155          | T                           | N                        | 8.6                           | 2                 | 63.1                           | 2                           |
| 155          | T                           | P                        | 7.8                           | 2                 | 128.4                          | 2                           |
| 155          | T                           | S                        | 51.8                          | 1                 | 35.2                           | 1                           |
| 156          | R                           | C                        | 23.9                          | 2                 | 82.9                           | 2                           |
| 156          | R                           | G                        | 7.5                           | 2                 | 56.5                           | 2                           |
| 156          | R                           | H                        | 18.6                          | 2                 | 100.0                          | 1                           |
| 156          | R                           | P                        | 8.2                           | 2                 | 64.4                           | 2                           |
| 157          | V                           | F                        | 9.1                           | 2                 | 39.8                           | 2                           |
| 157          | V                           | G                        | 8.8                           | 2                 | 25.6                           | 1                           |
| 157          | V                           | I                        | 33.6                          | 1                 | 68.5                           | 1                           |
| 158          | R                           | C                        | 10.1                          | 2                 | 86.0                           | 2                           |
| 158          | R                           | H                        | 8.8                           | 2                 | 63.9                           | 2                           |
| 158          | R                           | L                        | 8.2                           | 2                 | 168.4                          | 2                           |
| 158          | R                           | P                        | 10.2                          | 2                 | 100.1                          | 2                           |
| 159          | A                           | D                        | 10.2                          | 2                 | 75.3                           | 2                           |
| 159          | A                           | P                        | 9.7                           | 2                 | 71.2                           | 2                           |
| 159          | A                           | S                        | 29.7                          | 1                 | 53.7                           | 1                           |
| 159          | A                           | T                        | 85.3                          | 1                 | 35.2                           | 1                           |
| 159          | A                           | V                        | 6.9                           | 2                 | 66.4                           | 2                           |
| 160          | M                           | I                        | 25.3                          | 1                 | 43.3                           | 1                           |
| 160          | M                           | V                        | 42.2                          | 1                 | 86.6                           | 1                           |
| 161          | A                           | D                        | 2.4                           | 2                 | 104.7                          | 2                           |
| 161          | A                           | T                        | 13.3                          | 2                 | 118.7                          | 2                           |
| 162          | I                           | F                        | 6.5                           | 2                 | 60.1                           | 2                           |
| 163          | Y                           | C                        | 18.3                          | 2                 | 57.4                           | 2                           |
| 163          | Y                           | H                        | 11.2                          | 2                 | 59.8                           | 2                           |
| 163          | Y                           | N                        | 11.4                          | 2                 | 175.2                          | 2                           |
| 164          | K                           | E                        | 12.4                          | 2                 | 61.4                           | 2                           |
| 164          | K                           | N                        | 22.3                          | 2                 | 42.0                           | 1                           |
| 167          | Q                           | L                        | 23.8                          | 2                 | 89.2                           | 1                           |
| 167          | Q                           | R                        | 37.6                          | 1                 | 23.5                           | 1                           |
| 168          | H                           | P                        | 12.2                          | 2                 | 45.4                           | 2                           |

| <b>Codon</b> | <b>Wild type amino acid</b> | <b>Mutant amino acid</b> | <b>Measured WAF1 activity</b> | <b>Class WAF1</b> | <b>WAF1 predicted severity</b> | <b>WAF1 predicted class</b> |
|--------------|-----------------------------|--------------------------|-------------------------------|-------------------|--------------------------------|-----------------------------|
| 168          | H                           | R                        | 16.4                          | 2                 | 51.2                           | 1                           |
| 168          | H                           | Y                        | 50.9                          | 1                 | 50.5                           | 1                           |
| 169          | M                           | I                        | 40.2                          | 1                 | 46.7                           | 1                           |
| 169          | M                           | V                        | 43.9                          | 1                 | 56.0                           | 1                           |
| 170          | T                           | A                        | 45.2                          | 1                 | 46.6                           | 1                           |
| 170          | T                           | S                        | 42.1                          | 1                 | 22.1                           | 1                           |
| 171          | E                           | G                        | 3.2                           | 2                 | 99.0                           | 2                           |
| 171          | E                           | K                        | 54.7                          | 1                 | 55.4                           | 1                           |
| 172          | V                           | D                        | 3.3                           | 2                 | 61.2                           | 2                           |
| 172          | V                           | F                        | 8.2                           | 2                 | 41.7                           | 2                           |
| 173          | V                           | A                        | 7.5                           | 2                 | 44.7                           | 2                           |
| 173          | V                           | L                        | 3.6                           | 2                 | 45.6                           | 2                           |
| 173          | V                           | M                        | 10.5                          | 2                 | 67.4                           | 2                           |
| 174          | R                           | K                        | 65.7                          | 1                 | 35.9                           | 1                           |
| 174          | R                           | W                        | 16.4                          | 2                 | 44.4                           | 2                           |
| 175          | R                           | G                        | 10.5                          | 2                 | 90.3                           | 2                           |
| 175          | R                           | H                        | 12.4                          | 2                 | 188.9                          | 2                           |
| 175          | R                           | L                        | 13.2                          | 2                 | 93.3                           | 2                           |
| 176          | C                           | F                        | 22.9                          | 2                 | 69.8                           | 2                           |
| 176          | C                           | G                        | 16.0                          | 2                 | 171.0                          | 2                           |
| 176          | C                           | R                        | 10.6                          | 2                 | 238.1                          | 2                           |
| 176          | C                           | S                        | 13.3                          | 2                 | 104.9                          | 2                           |
| 176          | C                           | W                        | 15.2                          | 2                 | 234.3                          | 2                           |
| 176          | C                           | Y                        | 14.8                          | 2                 | 185.6                          | 2                           |
| 177          | P                           | R                        | 17.9                          | 2                 | 80.1                           | 2                           |
| 177          | P                           | S                        | 34.3                          | 1                 | 47.0                           | 1                           |
| 178          | H                           | D                        | 13.4                          | 2                 | 46.3                           | 1                           |
| 178          | H                           | P                        | 14.1                          | 2                 | 92.0                           | 2                           |
| 178          | H                           | R                        | 35.9                          | 1                 | 31.9                           | 1                           |
| 179          | H                           | D                        | 21.6                          | 2                 | 86.0                           | 2                           |
| 179          | H                           | L                        | 21.3                          | 2                 | 58.6                           | 2                           |
| 179          | H                           | N                        | 19.3                          | 2                 | 77.9                           | 2                           |
| 179          | H                           | Q                        | 17.5                          | 2                 | 169.8                          | 2                           |
| 179          | H                           | R                        | 13.0                          | 2                 | 153.5                          | 2                           |
| 179          | H                           | Y                        | 13.3                          | 2                 | 107.4                          | 2                           |
| 181          | R                           | C                        | 26.1                          | 1                 | 57.5                           | 2                           |
| 181          | R                           | H                        | 34.1                          | 1                 | 34.6                           | 1                           |
| 181          | R                           | P                        | 14.1                          | 2                 | 53.1                           | 1                           |
| 184          | D                           | N                        | 56.1                          | 1                 | 64.1                           | 1                           |
| 185          | S                           | R                        | 69.4                          | 1                 | 44.0                           | 1                           |
| 189          | A                           | V                        | 56.1                          | 1                 | 50.8                           | 1                           |
| 190          | P                           | L                        | 10.1                          | 2                 | 47.3                           | 2                           |
| 191          | P                           | L                        | 25.7                          | 1                 | 108.7                          | 1                           |
| 192          | Q                           | R                        | 31.6                          | 1                 | 26.8                           | 1                           |
| 193          | H                           | D                        | 11.7                          | 2                 | 76.6                           | 2                           |
| 193          | H                           | L                        | 11.0                          | 2                 | 87.8                           | 2                           |

| <b>Codon</b> | <b>Wild type amino acid</b> | <b>Mutant amino acid</b> | <b>Measured WAF1 activity</b> | <b>Class WAF1</b> | <b>WAF1 predicted severity</b> | <b>WAF1 predicted class</b> |
|--------------|-----------------------------|--------------------------|-------------------------------|-------------------|--------------------------------|-----------------------------|
| 193          | H                           | P                        | 10.0                          | 2                 | 105.5                          | 2                           |
| 193          | H                           | R                        | 10.2                          | 2                 | 67.4                           | 2                           |
| 193          | H                           | Y                        | 5.0                           | 2                 | 38.2                           | 2                           |
| 194          | L                           | F                        | 14.4                          | 2                 | 60.4                           | 2                           |
| 194          | L                           | P                        | 0.3                           | 2                 | 92.1                           | 2                           |
| 194          | L                           | R                        | 10.6                          | 2                 | 77.4                           | 2                           |
| 195          | I                           | F                        | 10.5                          | 2                 | 54.5                           | 1                           |
| 195          | I                           | T                        | 11.2                          | 2                 | 62.9                           | 2                           |
| 196          | R                           | P                        | 12.2                          | 2                 | 88.4                           | 2                           |
| 196          | R                           | Q                        | 24.6                          | 2                 | 82.6                           | 2                           |
| 197          | V                           | G                        | 7.9                           | 2                 | 60.7                           | 2                           |
| 197          | V                           | L                        | 12.4                          | 2                 | 54.6                           | 2                           |
| 198          | E                           | K                        | 66.2                          | 1                 | 110.8                          | 1                           |
| 199          | G                           | R                        | 45.8                          | 1                 | 34.3                           | 1                           |
| 202          | R                           | H                        | 49.8                          | 1                 | 31.9                           | 1                           |
| 202          | R                           | S                        | 47.6                          | 1                 | 111.4                          | 1                           |
| 205          | Y                           | C                        | 8.9                           | 2                 | 84.7                           | 2                           |
| 205          | Y                           | D                        | 9.6                           | 2                 | 70.7                           | 2                           |
| 205          | Y                           | S                        | 8.9                           | 2                 | 101.2                          | 2                           |
| 208          | D                           | E                        | 11.6                          | 2                 | 57.8                           | 2                           |
| 208          | D                           | V                        | 4.7                           | 2                 | 63.4                           | 2                           |
| 209          | R                           | K                        | 112.7                         | 1                 | 21.3                           | 1                           |
| 211          | T                           | A                        | 5.9                           | 2                 | 31.9                           | 1                           |
| 212          | F                           | L                        | 70.4                          | 1                 | 17.9                           | 1                           |
| 213          | R                           | L                        | 0.7                           | 2                 | 55.7                           | 2                           |
| 213          | R                           | Q                        | 2.2                           | 2                 | 69.1                           | 2                           |
| 214          | H                           | R                        | 3.1                           | 2                 | 57.6                           | 2                           |
| 214          | H                           | Y                        | 3.2                           | 2                 | 57.1                           | 2                           |
| 215          | S                           | C                        | 25.5                          | 1                 | 50.5                           | 2                           |
| 215          | S                           | G                        | 2.7                           | 2                 | 63.9                           | 2                           |
| 215          | S                           | I                        | 8.1                           | 2                 | 69.6                           | 2                           |
| 215          | S                           | N                        | 4.0                           | 2                 | 129.2                          | 2                           |
| 216          | V                           | E                        | 17.7                          | 2                 | 70.8                           | 2                           |
| 216          | V                           | L                        | 2.7                           | 2                 | 46.4                           | 2                           |
| 216          | V                           | M                        | 0.2                           | 2                 | 129.3                          | 2                           |
| 217          | V                           | M                        | 95.1                          | 1                 | 85.9                           | 1                           |
| 218          | V                           | A                        | 69.3                          | 1                 | 82.3                           | 2                           |
| 218          | V                           | E                        | 4.4                           | 2                 | 56.0                           | 2                           |
| 218          | V                           | M                        | 0.8                           | 2                 | 50.7                           | 1                           |
| 219          | P                           | L                        | 4.2                           | 2                 | 99.5                           | 2                           |
| 220          | Y                           | C                        | 1.2                           | 2                 | 91.0                           | 2                           |
| 220          | Y                           | H                        | 1.0                           | 2                 | 42.1                           | 2                           |
| 220          | Y                           | S                        | 0.0                           | 2                 | 84.9                           | 2                           |
| 221          | E                           | D                        | 126.0                         | 1                 | 47.7                           | 1                           |
| 222          | P                           | S                        | 82.9                          | 1                 | 38.0                           | 1                           |
| 224          | E                           | D                        | 59.7                          | 1                 | 68.4                           | 1                           |

| <b>Codon</b> | <b>Wild type amino acid</b> | <b>Mutant amino acid</b> | <b>Measured WAF1 activity</b> | <b>Class WAF1</b> | <b>WAF1 predicted severity</b> | <b>WAF1 predicted class</b> |
|--------------|-----------------------------|--------------------------|-------------------------------|-------------------|--------------------------------|-----------------------------|
| 224          | E                           | K                        | 38.5                          | 1                 | 42.3                           | 1                           |
| 226          | G                           | D                        | 72.7                          | 1                 | 20.5                           | 1                           |
| 227          | S                           | F                        | 21.8                          | 2                 | 73.4                           | 2                           |
| 228          | D                           | G                        | 75.4                          | 1                 | 38.7                           | 1                           |
| 228          | D                           | N                        | 22.8                          | 2                 | 42.0                           | 1                           |
| 230          | T                           | I                        | 52.3                          | 1                 | 154.3                          | 2                           |
| 232          | I                           | F                        | 2.5                           | 2                 | 51.9                           | 1                           |
| 232          | I                           | S                        | 0.0                           | 2                 | 39.1                           | 2                           |
| 232          | I                           | T                        | 1.9                           | 2                 | 70.2                           | 2                           |
| 233          | H                           | Y                        | 77.2                          | 1                 | 43.7                           | 1                           |
| 234          | Y                           | C                        | 2.1                           | 2                 | 173.9                          | 2                           |
| 234          | Y                           | H                        | 0.0                           | 2                 | 116.1                          | 2                           |
| 234          | Y                           | N                        | 0.4                           | 2                 | 67.9                           | 2                           |
| 235          | N                           | S                        | 73.1                          | 1                 | 108.8                          | 1                           |
| 236          | Y                           | C                        | 0.7                           | 2                 | 191.0                          | 2                           |
| 236          | Y                           | N                        | 80.2                          | 1                 | 68.6                           | 2                           |
| 237          | M                           | I                        | 0.4                           | 2                 | 41.3                           | 2                           |
| 237          | M                           | K                        | 14.2                          | 2                 | 192.2                          | 2                           |
| 237          | M                           | V                        | 13.8                          | 2                 | 107.3                          | 1                           |
| 238          | C                           | F                        | 0.8                           | 2                 | 65.2                           | 2                           |
| 238          | C                           | G                        | 13.9                          | 2                 | 90.6                           | 2                           |
| 238          | C                           | R                        | 0.5                           | 2                 | 188.5                          | 2                           |
| 238          | C                           | S                        | 15.2                          | 2                 | 104.2                          | 2                           |
| 238          | C                           | Y                        | 14.6                          | 2                 | 159.5                          | 2                           |
| 239          | N                           | D                        | 20.2                          | 2                 | 97.6                           | 2                           |
| 239          | N                           | K                        | 18.1                          | 2                 | 150.0                          | 2                           |
| 239          | N                           | S                        | 14.9                          | 2                 | 166.7                          | 2                           |
| 239          | N                           | T                        | 1.1                           | 2                 | 115.2                          | 2                           |
| 240          | S                           | I                        | 6.0                           | 2                 | 65.8                           | 2                           |
| 240          | S                           | R                        | 12.2                          | 2                 | 163.0                          | 2                           |
| 241          | S                           | A                        | 15.7                          | 2                 | 78.3                           | 2                           |
| 241          | S                           | C                        | 0.0                           | 2                 | 90.8                           | 2                           |
| 241          | S                           | F                        | 0.0                           | 2                 | 75.3                           | 2                           |
| 241          | S                           | P                        | 0.5                           | 2                 | 45.4                           | 2                           |
| 242          | C                           | F                        | 13.8                          | 2                 | 59.8                           | 2                           |
| 242          | C                           | G                        | 0.0                           | 2                 | 58.3                           | 2                           |
| 242          | C                           | S                        | 0.0                           | 2                 | 160.1                          | 2                           |
| 242          | C                           | W                        | 14.2                          | 2                 | 55.3                           | 2                           |
| 242          | C                           | Y                        | 0.0                           | 2                 | 179.0                          | 2                           |
| 243          | M                           | I                        | 46.4                          | 1                 | 126.7                          | 2                           |
| 243          | M                           | L                        | 0.0                           | 2                 | 110.4                          | 1                           |
| 243          | M                           | T                        | 7.2                           | 2                 | 160.9                          | 2                           |
| 244          | G                           | C                        | 0.0                           | 2                 | 56.3                           | 1                           |
| 244          | G                           | D                        | 0.5                           | 2                 | 46.1                           | 1                           |
| 244          | G                           | S                        | 0.3                           | 2                 | 29.5                           | 1                           |
| 244          | G                           | V                        | 0.0                           | 2                 | 70.8                           | 2                           |

| <b>Codon</b> | <b>Wild type amino acid</b> | <b>Mutant amino acid</b> | <b>Measured WAF1 activity</b> | <b>Class WAF1</b> | <b>WAF1 predicted severity</b> | <b>WAF1 predicted class</b> |
|--------------|-----------------------------|--------------------------|-------------------------------|-------------------|--------------------------------|-----------------------------|
| 245          | G                           | C                        | 0.0                           | 2                 | 61.5                           | 2                           |
| 245          | G                           | D                        | 2.0                           | 2                 | 78.3                           | 2                           |
| 245          | G                           | R                        | 7.9                           | 2                 | 128.5                          | 2                           |
| 245          | G                           | S                        | 0.0                           | 2                 | 80.0                           | 2                           |
| 245          | G                           | V                        | 0.0                           | 2                 | 96.3                           | 2                           |
| 246          | M                           | I                        | 0.3                           | 2                 | 38.0                           | 2                           |
| 246          | M                           | L                        | 0.0                           | 2                 | 63.5                           | 2                           |
| 246          | M                           | R                        | 2.9                           | 2                 | 175.4                          | 2                           |
| 246          | M                           | T                        | 0.0                           | 2                 | 112.6                          | 2                           |
| 246          | M                           | V                        | 0.0                           | 2                 | 134.7                          | 2                           |
| 248          | R                           | G                        | 0.0                           | 2                 | 154.8                          | 2                           |
| 248          | R                           | L                        | 0.0                           | 2                 | 164.4                          | 2                           |
| 248          | R                           | P                        | 6.5                           | 2                 | 199.3                          | 2                           |
| 248          | R                           | Q                        | 0.0                           | 2                 | 44.2                           | 2                           |
| 248          | R                           | W                        | 0.0                           | 2                 | 175.6                          | 2                           |
| 249          | R                           | G                        | 0.2                           | 2                 | 94.2                           | 2                           |
| 249          | R                           | K                        | 1.2                           | 2                 | 76.2                           | 2                           |
| 249          | R                           | M                        | 0.0                           | 2                 | 94.9                           | 2                           |
| 249          | R                           | S                        | 12.4                          | 2                 | 85.7                           | 2                           |
| 249          | R                           | T                        | 0.0                           | 2                 | 126.1                          | 2                           |
| 249          | R                           | W                        | 6.8                           | 2                 | 110.4                          | 2                           |
| 250          | P                           | A                        | 46.6                          | 1                 | 34.4                           | 1                           |
| 250          | P                           | L                        | 0.0                           | 2                 | 68.9                           | 2                           |
| 250          | P                           | S                        | 36.8                          | 1                 | 110.0                          | 1                           |
| 251          | I                           | N                        | 8.8                           | 2                 | 89.3                           | 2                           |
| 251          | I                           | S                        | 0.0                           | 2                 | 66.3                           | 2                           |
| 251          | I                           | V                        | 11.9                          | 2                 | 116.4                          | 2                           |
| 252          | L                           | F                        | 63.2                          | 1                 | 66.3                           | 1                           |
| 253          | T                           | I                        | 4.1                           | 2                 | 81.8                           | 2                           |
| 254          | I                           | N                        | 6.2                           | 2                 | 44.8                           | 2                           |
| 254          | I                           | T                        | 0.9                           | 2                 | 70.6                           | 2                           |
| 255          | I                           | F                        | 0.5                           | 2                 | 115.0                          | 2                           |
| 255          | I                           | N                        | 7.0                           | 2                 | 68.0                           | 2                           |
| 255          | I                           | T                        | 11.9                          | 2                 | 69.5                           | 2                           |
| 256          | T                           | A                        | 10.8                          | 2                 | 97.0                           | 1                           |
| 256          | T                           | I                        | 5.8                           | 2                 | 83.6                           | 2                           |
| 257          | L                           | P                        | 12.6                          | 2                 | 53.3                           | 2                           |
| 258          | E                           | G                        | 0.0                           | 2                 | 45.9                           | 2                           |
| 258          | E                           | K                        | 0.3                           | 2                 | 67.5                           | 2                           |
| 258          | E                           | Q                        | 16.4                          | 2                 | 112.7                          | 2                           |
| 259          | D                           | V                        | 10.9                          | 2                 | 68.6                           | 1                           |
| 259          | D                           | Y                        | 9.9                           | 2                 | 61.4                           | 2                           |
| 262          | G                           | S                        | 5.8                           | 2                 | 44.5                           | 1                           |
| 262          | G                           | V                        | 11.7                          | 2                 | 36.7                           | 2                           |
| 263          | N                           | D                        | 18.1                          | 2                 | 24.5                           | 1                           |
| 265          | L                           | P                        | 0.0                           | 2                 | 185.5                          | 2                           |

| <b>Codon</b> | <b>Wild type amino acid</b> | <b>Mutant amino acid</b> | <b>Measured WAF1 activity</b> | <b>Class WAF1</b> | <b>WAF1 predicted severity</b> | <b>WAF1 predicted class</b> |
|--------------|-----------------------------|--------------------------|-------------------------------|-------------------|--------------------------------|-----------------------------|
| 266          | G                           | E                        | 0.0                           | 2                 | 82.5                           | 2                           |
| 266          | G                           | R                        | 10.8                          | 2                 | 80.2                           | 2                           |
| 266          | G                           | V                        | 0.0                           | 2                 | 113.5                          | 2                           |
| 267          | R                           | P                        | 0.0                           | 2                 | 76.4                           | 2                           |
| 267          | R                           | Q                        | 9.8                           | 2                 | 41.3                           | 2                           |
| 269          | S                           | N                        | 17.1                          | 2                 | 60.1                           | 2                           |
| 270          | F                           | C                        | 0.0                           | 2                 | 71.3                           | 2                           |
| 270          | F                           | L                        | 8.1                           | 2                 | 60.5                           | 2                           |
| 270          | F                           | S                        | 0.0                           | 2                 | 49.9                           | 2                           |
| 270          | F                           | Y                        | 62.7                          | 1                 | 57.3                           | 1                           |
| 271          | E                           | K                        | 8.6                           | 2                 | 151.0                          | 2                           |
| 271          | E                           | Q                        | 13.0                          | 2                 | 82.5                           | 2                           |
| 272          | V                           | A                        | 1.0                           | 2                 | 125.4                          | 2                           |
| 272          | V                           | G                        | 0.0                           | 2                 | 120.0                          | 2                           |
| 272          | V                           | L                        | 7.1                           | 2                 | 43.0                           | 2                           |
| 272          | V                           | M                        | 8.8                           | 2                 | 66.1                           | 2                           |
| 273          | R                           | C                        | 0.9                           | 2                 | 183.1                          | 2                           |
| 273          | R                           | G                        | 16.7                          | 2                 | 156.8                          | 2                           |
| 273          | R                           | H                        | 1.0                           | 2                 | 85.2                           | 2                           |
| 273          | R                           | L                        | 0.9                           | 2                 | 171.0                          | 2                           |
| 273          | R                           | P                        | 0.6                           | 2                 | 163.0                          | 2                           |
| 273          | R                           | S                        | 17.4                          | 2                 | 63.4                           | 2                           |
| 274          | V                           | A                        | 1.4                           | 2                 | 117.8                          | 2                           |
| 274          | V                           | D                        | 1.3                           | 2                 | 37.4                           | 2                           |
| 274          | V                           | G                        | 5.3                           | 2                 | 115.7                          | 2                           |
| 274          | V                           | I                        | 119.1                         | 1                 | 69.4                           | 1                           |
| 275          | C                           | F                        | 0.0                           | 2                 | 119.2                          | 2                           |
| 275          | C                           | G                        | 0.6                           | 2                 | 91.4                           | 2                           |
| 275          | C                           | R                        | 0.4                           | 2                 | 139.1                          | 2                           |
| 275          | C                           | S                        | 0.6                           | 2                 | 187.5                          | 2                           |
| 275          | C                           | W                        | 0.7                           | 2                 | 130.4                          | 2                           |
| 275          | C                           | Y                        | 0.4                           | 2                 | 168.5                          | 2                           |
| 276          | A                           | D                        | 0.4                           | 2                 | 58.7                           | 2                           |
| 276          | A                           | P                        | 0.6                           | 2                 | 51.4                           | 1                           |
| 276          | A                           | T                        | 20.2                          | 2                 | 26.6                           | 1                           |
| 276          | A                           | V                        | 10.5                          | 2                 | 24.4                           | 1                           |
| 277          | C                           | F                        | 0.3                           | 2                 | 150.4                          | 2                           |
| 277          | C                           | Y                        | 0.7                           | 2                 | 161.5                          | 2                           |
| 278          | P                           | A                        | 14.9                          | 2                 | 46.6                           | 2                           |
| 278          | P                           | H                        | 0.3                           | 2                 | 156.6                          | 2                           |
| 278          | P                           | L                        | 0.8                           | 2                 | 87.4                           | 2                           |
| 278          | P                           | R                        | 0.7                           | 2                 | 79.5                           | 2                           |
| 278          | P                           | S                        | 0.3                           | 2                 | 124.2                          | 2                           |
| 278          | P                           | T                        | 0.1                           | 2                 | 67.7                           | 2                           |
| 279          | G                           | E                        | 0.3                           | 2                 | 68.4                           | 2                           |
| 280          | R                           | G                        | 21.1                          | 2                 | 142.6                          | 2                           |

| <b>Codon</b> | <b>Wild type amino acid</b> | <b>Mutant amino acid</b> | <b>Measured WAF1 activity</b> | <b>Class WAF1</b> | <b>WAF1 predicted severity</b> | <b>WAF1 predicted class</b> |
|--------------|-----------------------------|--------------------------|-------------------------------|-------------------|--------------------------------|-----------------------------|
| 280          | R                           | I                        | 0.2                           | 2                 | 117.6                          | 2                           |
| 280          | R                           | K                        | 0.5                           | 2                 | 65.4                           | 2                           |
| 280          | R                           | T                        | 0.3                           | 2                 | 114.7                          | 2                           |
| 281          | D                           | E                        | 1.7                           | 2                 | 89.9                           | 2                           |
| 281          | D                           | G                        | 12.1                          | 2                 | 61.1                           | 2                           |
| 281          | D                           | H                        | 0.7                           | 2                 | 73.6                           | 2                           |
| 281          | D                           | N                        | 0.5                           | 2                 | 84.4                           | 2                           |
| 282          | R                           | G                        | 0.4                           | 2                 | 167.9                          | 2                           |
| 282          | R                           | L                        | 28.0                          | 1                 | 112.1                          | 2                           |
| 282          | R                           | P                        | 0.0                           | 2                 | 92.1                           | 2                           |
| 282          | R                           | Q                        | 7.2                           | 2                 | 75.5                           | 2                           |
| 282          | R                           | W                        | 0.6                           | 2                 | 108.5                          | 2                           |
| 283          | R                           | C                        | 25.3                          | 1                 | 158.3                          | 2                           |
| 283          | R                           | H                        | 0.5                           | 2                 | 133.3                          | 2                           |
| 283          | R                           | P                        | 0.2                           | 2                 | 155.8                          | 2                           |
| 284          | T                           | P                        | 7.3                           | 2                 | 83.6                           | 2                           |
| 285          | E                           | K                        | 0.6                           | 2                 | 41.5                           | 2                           |
| 286          | E                           | A                        | 0.2                           | 2                 | 46.8                           | 2                           |
| 286          | E                           | G                        | 0.1                           | 2                 | 77.2                           | 2                           |
| 286          | E                           | K                        | 11.1                          | 2                 | 71.1                           | 2                           |
| 287          | E                           | K                        | 56.7                          | 1                 | 33.4                           | 1                           |
